1 **The draft genome of the endangered, relictual plant *Kingdonia***  
2 ***uniflora* (Circaeasteraceae, Ranunculales) reveals potential**  
3 **mechanisms and perils of evolutionary specialization**

4 Yanxia Sun<sup>#,1,2</sup>, Tao Deng<sup>#,3</sup>, Aidi Zhang<sup>#,1,4</sup>, Michael J. Moore<sup>5</sup>, Jacob B. Landis<sup>6</sup>,  
5 Nan Lin<sup>1</sup>, Huajie Zhang<sup>1</sup>, Xu Zhang<sup>1</sup>, Jinling Huang<sup>7</sup>, Xiujun Zhang<sup>\*,1,4</sup>, Hang Sun<sup>\*,3</sup>,  
6 Hengchang Wang<sup>\*,1,2</sup>

7

8 <sup>1</sup>CAS Key Laboratory of Plant Germplasm Enhancement and Specialty Agriculture, Wuhan  
9 Botanical Garden, Chinese Academy of Sciences, Wuhan, Hubei, China

10 <sup>2</sup>Center of Conservation Biology, Core Botanical Gardens, Chinese Academy of Sciences, Wuhan,  
11 Hubei, China

12 <sup>3</sup>Key Laboratory for Plant Diversity and Biogeography of East Asia, Kunming Institute of Botany,  
13 Chinese Academy of Sciences, Kunming, Yunnan, China

14 <sup>4</sup>Center of Economic Botany, Core Botanical Gardens, Chinese Academy of Sciences, Wuhan,  
15 Hubei, China

16 <sup>5</sup>Department of Biology, Oberlin College, Oberlin, OH, USA

17 <sup>6</sup>Department of Botany and Plant Sciences, University of California Riverside, Riverside, CA,  
18 USA

19 <sup>7</sup>Department of Biology, East Carolina University, Greenville, NC, USA

20 <sup>#</sup>These authors contributed equally to this article.

21 **\*Corresponding author:** E-mail: hcwang@wbgcas.cn, sunhang@mail.kib.ac.cn,  
22 zhangxj@wbgcas.cn

23

24

25

26

27

28

29 **Abstract**

30 ***Kingdonia uniflora*, an alpine herb, has an extremely narrow distribution and**  
31 **represents a model for studying evolutionary mechanisms of species that have**  
32 **adapted to undisturbed environments for evolutionary long periods of time. We**  
33 **assembled a 1,004.7-Mb draft genome (encoding 43,301 genes) and investigated**  
34 **the evolutionary history of *K. uniflora*, along with mechanisms related to its**  
35 **endangered status. Phylogenomic analyses based on 497 single copy genes**  
36 **confirmed the sister relationship between *K. uniflora* and *Circaeaster agrestis*,**  
37 **which were estimated to have diverged around 52 Mya. Proliferation of LTR**  
38 **retrotransposons in *K. uniflora* is estimated to occur around 2.7 Mya, coinciding**  
39 **with one recent uplift of the Hengduan Mountains between the late Miocene and**  
40 **late Pliocene. Across 12 species of monocots, early-diverging eudicots and core**  
41 **eudicots, *K. uniflora* showed significant overrepresentation in gene families**  
42 **associated with DNA repair and underrepresentation in gene families associated**  
43 **with stress response. Most of the plastid *ndh* genes were found to be lost not only**  
44 **in the plastome but also in the nuclear genome of *K. uniflora*. During the**  
45 **evolutionary process, the overrepresentation of gene families involved in DNA**  
46 **repair could help asexual *K. uniflora* reduce the accumulation of deleterious**  
47 **mutations, while at the same time, reducing genetic diversity which is important**  
48 **in responding to environment fluctuations. The underrepresentation of gene**  
49 **families related to stress response and functional loss of *ndh* genes could be due**  
50 **to lack or loss of ability to respond to environmental changes caused by**  
51 **long-term adaptation to a relatively stable ecological environment.**

52 ***Key words: Kingdonia uniflora*, evolutionary mechanisms, draft genome, LTR**  
53 **retrotransposons, gene families, DNA repair, stress response**

54

55

56

57

## 58 **Introduction**

59 Habitat destruction caused by changing climate and human activities has driven  
60 numerous plant species to endangered status (Yang et al., 2018). Recently there has  
61 been a push to establish natural reserves to reduce the chance of extinction in  
62 vulnerable species. Nevertheless, as generally recognized, there is a need to apply  
63 genomics in conservation, employing genomic analyses to preserve plant diversity  
64 (Shafer et al., 2015). Genomics provides new opportunities for a detailed  
65 understanding of genetic diversity across the genome and the process involved in  
66 generating or losing this diversity (Windig and Engelsma, 2011), which provides aid  
67 to those making crucial policy decisions for conservation (Garner et al., 2016).

68 Plant lineages vary widely in their geographic distributions due to numerous factors,  
69 among which one crucial factor is adaptive capacity to respond to environmental  
70 changes. Lineages maintaining a small distribution are likely to possess low  
71 adaptive capacity to respond to geological and climatic changes at large scales, as  
72 well as habitat changes at small scales. For example, some asexual lineages,  
73 generating genetically and phenotypically identical individuals, are limited in their  
74 capacity to respond quickly to environmental fluctuation due to low genetic diversity,  
75 which can lead to a status of endangerment or even extinction (Bell and Collins, 2008).  
76 In addition, species living in an equable environment for long periods might lack or  
77 lose the ability to defend against rapidly fluctuating environmental stress. Once the  
78 habitat is altered or destroyed, these species are incapable of colonizing new habitats.  
79 Shrinking habitats and low adaptive ability to new environments together lead some  
80 plants to endangered status.

81 *Kingdonia uniflora* Balf. f. and W.W. Sm. (Circaeasteraceae, Ranunculales), an  
82 alpine herb (diploid,  $2n=18$ ) has a very narrow distribution (Figure S1). The habitat of  
83 *K. uniflora* represents an ecological environment of primeval forest with few  
84 disturbances. Specifically, *K. uniflora* is restricted to growing in high altitudes  
85 (~2800-4000 m), cold, damp climates with deep humus, and usually under species of  
86 *Abies*. *Kingdonia uniflora* and *Circaeaster agrestis* Maxim. together constitute the

87 early-diverging eudicot family Circaeasteraceae (Ranunculales) (APG IV, 2016).  
88 Previous estimates showed *K. uniflora* diverged from *C. agrestis* around 52 Mya  
89 (Ruiz-Sanchez et al., 2012); although no fossil record is known for *K. uniflora*, fossil  
90 fruits similar to those of *C. agrestis* have been reported from the mid-Albian of  
91 Virginia, USA (Crane et al., 1994; Drinna et al., 1994; Sun et al., 2017). Remarkably,  
92 different from all other angiosperms, *K. uniflora* and *C. agrestis* possess an unusual  
93 dichotomous venation (Figure S2) similar to that found in ferns and *Ginkgo* (Sun et al.,  
94 2017). All above indicate an ancient relictual character for *K. uniflora*. Additionally,  
95 *K. uniflora* typically reproduces asexually, relying on rhizome systems to produce  
96 new individuals. Hence, *K. uniflora* provides an ideal model to study the evolutionary  
97 mechanisms of ancient plant lineages that have an extremely narrow distribution and  
98 rely on a highly specialized habitat.

99 A previous study (Sun et al., 2017) found rampant loss and pseudogenization of *ndh*  
100 genes in the *Kingdonia uniflora* plastome. The possibility of the transfer of the lost  
101 plastid segments to the nuclear genome at that time could not be determined. In the  
102 present study, we provide a *de novo* genome sequence of *K. uniflora* using both  
103 Illumina and Pacbio sequencing technologies. We aim to investigate the evolutionary  
104 history of *K. uniflora* and reveal the potential mechanisms of its evolutionary  
105 specialization.

106

## 107 **Results**

### 108 **Genome assembly and annotation**

109 Genome size estimation using flow cytometry suggested a haploid genome size of  
110 1150 Mb for *K. uniflora* (Figure S3), while *k*-mer statistics indicated a similar genome  
111 size of 1170 Mb, with very low heterozygosity (Figure S4, Table S1). In the present  
112 study, we generated 236 Gb of Illumina reads and 106 Gb Pacbio reads (Table S2). A  
113 total assembly of 1,004.7 Mb (representing ~86% of the estimated genome size),  
114 consisting of 2,932 scaffolds (scaffold N50 length, 2.09 Mb; longest scaffold, 11.5  
115 Mb) was achieved (Table 1). A total of 43,301 protein-coding genes were predicted



116 (Table 1), among which 35,953 genes (83.03%) were functionally annotated (Table  
117 S3). In addition to protein-coding genes, various noncoding RNA sequences were  
118 identified and annotated (Table S4), including 1,124 transfer RNAs, 715 ribosomal  
119 RNAs, 125 microRNAs, and 1,751 small nuclear RNAs. The completeness of gene  
120 regions assessed by BUSCO (Benchmarking Universal Single Copy Orthologs)  
121 showed that 90.6% of the green plant single-copy orthologs were complete (Table  
122 S5).

123 We compared the draft genome of *Kingdonia uniflora* with the well-annotated  
124 genomes of the model plant *Arabidopsis thaliana* (Brassicaceae) and the  
125 Ranunculales species *Aquilegia coerulea* (Ranunculaceae). The genome size of *K.*  
126 *uniflora* is much larger than that of both references. The *K. uniflora* genome showed  
127 strong synteny with the genome of *Aq. coerulea* (Figure 1), but weak synteny with  
128 that of *A. thaliana* (Figure S5), which is not surprising given their placement in the  
129 angiosperm tree of life. The gene density in *K. uniflora* is lower than that in *Aq.*  
130 *coerulea* and *A. thaliana*; while the density of TEs (transposable elements) in *K.*  
131 *uniflora* was higher than that in *Aq. coerulea* and *A. thaliana* (Figures 1 and S5).

132 We also compared our draft genome sequence to five other draft genomes of  
133 Ranunculales taxa, representing three of the seven Ranunculales families that have  
134 reported genome sequences available (Table S6); the quality of our assembly is  
135 comparable to that of all the five species, generating the longest N50 length and  
136 relatively fewer scaffolds. Comparatively, the genome of *K. uniflora* is larger than  
137 other Ranunculales species with sequenced genomes, such as *Aq. coerulea* (293.08  
138 Mb), *Eschscholzia californica* (489.065 Mb) and *Macleaya cordata* (377.83 Mb), the  
139 (Table S6).

140

## 141 Repeat elements

142 Through a combination of approaches, we annotated 66.83% of the assembly as  
143 repetitive elements, among which LTRs were the most abundant, occupying 40.62%  
144 of the genome assembly length; DNA elements and long interspersed nuclear

145 elements occupied 5.0% and 3.0% of the genome, respectively (Table S7). The  
146 proliferation of LTR retrotransposons in *K. uniflora* was estimated to peak around 2.7  
147 Mya (Figure 2A). Analyses of age distributions built from synonymous substitutions  
148 per synonymous site ( $K_s$ ) indicated that *K. uniflora* has undergone one recent WGD  
149 event, which occurred after its divergence from *C. agrestis* (Figure 2B). The inferred  
150 WGD event in the *K. uniflora* genome was further supported by dot-plot analysis of  
151 representative scaffolds, in which numerous paralogs derived from this event were  
152 identified (Figure 2C).

153

## 154 Phylogenetic tree construction and estimation of divergence times

155 Applying OrthoFinder (Emms and Kelly, 2015) to eight whole-genome and four  
156 transcriptome sequences including monocots, basal eudicots and core eudicots, we  
157 identified a total of 18,742 orthogroups, among which 6,883 were shared by  
158 *Kingdonia* and four other Ranunculales species (Figure 2D). Among these  
159 orthogroups, 497 were identified as putative single-copy gene families. To further  
160 investigate the phylogenetic relationships within Ranunculales, we conducted both  
161 concatenated and coalescent analyses using the sequences of 497 single-copy genes in  
162 12 species. The topologies from two analyses were identical, confirming the sister  
163 relationship between *K. uniflora* and *C. agrestis*, and resolving Circaeasteraceae as  
164 sister to the clade formed by Ranunculaceae and Berberidaceae (Figure 3);  
165 Papaveraceae + Eupteleaceae was placed as the earliest-diverging clade (Figure 3). *K.*  
166 *uniflora* and *C. agrestis* were estimated to have diverged ~51.8 Mya in our analyses  
167 using MCMCtree with two calibration points (Figure 3). In addition, the phylogenetic  
168 analysis with an expanded group of taxa, which correspond to a larger taxonomic  
169 sampling but fewer loci indicated a similar phylogeny of Ranunculales, except the  
170 placement of Eupteleaceae (Figure S6).

171

## 172 Gene family overrepresentation and underrepresentation

173 Comparisons of the genomes among 12 species identified a total of 111 gene families

174 that are significantly ( $P < 0.01$ ) overrepresented in *K. uniflora* and 22 gene families  
175 that are significantly underrepresented (Table S8). The results from Kyoto  
176 Encyclopedia of Genes and Genomes (KEGG) and Gene Ontology (GO) annotations  
177 showed that overrepresented gene families were considerably enriched in DNA repair  
178 pathways, such as homologous recombination, mismatch repair, DNA replication and  
179 nucleotide excision repair; while gene families showing significant  
180 underrepresentation in the *K. uniflora* genome were found to be involved in pathways  
181 related to stress or pest responses, such as the phenylpropanoid biosynthesis and  
182 secondary metabolites biosynthesis (Table 2).

183

#### 184 Dispensability of plastid *ndh* genes

185 To detect whether the *ndh* genes/segments lost from *K. uniflora* plastome were  
186 transferred to the nuclear genome, we conducted a BLASTN search using 11 intact  
187 *ndh* sequences extracted from *C. agrestis* as the query, using the assembled *K.*  
188 *uniflora* genome sequences as target. The result showed that no intact sequences for  
189 *ndh* plastid genes were discovered with the exception of *ndhE* and *ndhJ*, indicating  
190 functional copies of these genes likely have been lost (Table S9, Figure 4).

191

## 192 Discussion

193 Species that live in stable habitats face less stress, which can cause lack or loss of  
194 ability to respond to environmental changes. In the present study, we *de novo*  
195 assembled the genome of *K. uniflora*, an ancient relictual species exclusively found in  
196 China. Given that *K. uniflora* has a larger genome than many of its close relatives, we  
197 hypothesize that the proliferation of LTR retrotransposons and the WGD event  
198 together are likely responsible for the increased genome size of *K. uniflora* (Michael,  
199 2014). Several studies (Tenailon et al., 2010; Michael, 2014) have suggested the  
200 proliferation of TEs and specifically long terminal repeat retrotransposons (LTRs) in  
201 genomes is the primary driver of genome size differences in plants. This is because  
202 LTRs are expressed as RNA and reverse-transcribed into a new DNA element that can

203 be inserted every replication cycle (Wicker et al., 2007). A comparative study using  
204 high quality genomes detected a correlation between intact LTR retrotransposons and  
205 genome size (El Baidouri et al., 2013). Abundant LTR retrotransposons were detected  
206 in the genome of *K. uniflora*, while considerably fewer LTR retrotransposons were  
207 identified in other members of the order with sequenced genomes (Figure 1). To  
208 investigate the evolutionary dynamics of the LTR retrotransposons, we estimated their  
209 insertion dates. The results indicate the proliferation of LTR retrotransposons in *K.*  
210 *uniflora* was likely triggered around one rapid uplift of the Hengduan Mountains  
211 region, occurring between the late Miocene and late Pliocene (Kirby et al., 2002;  
212 Clark et al., 2005; Sun et al., 2011; Wang et al., 2012; 2014; Meng et al., 2016; Xing  
213 and Ree, 2017). Whole genome duplications (WGD) have been shown to pervade the  
214 evolutionary history of angiosperms (Landis et al., 2018), and *K. uniflora* is no  
215 different (Figures 2B and 2C). Therefore, the relatively larger genome size of *K.*  
216 *uniflora* compared to close relatives might be promoted by both LTRs proliferation  
217 and WGD events.

218 Based on phylogenetic inference and estimated divergence times, we speculate that  
219 the speciation of *K. uniflora* was promoted by the Himalaya orogeny. Previous DNA  
220 based studies commonly recognized that *Kingdonia uniflora* is closely related to  
221 *Circaeaster agrestis* (Kim et al., 2004; Wang et al., 2009; Sun et al., 2017); but the  
222 relationships within Ranunculales have remained unstable (e.g., Kim et al., 2004;  
223 Wang et al., 2009; Sun et al., 2017; Lane et al., 2018). Our phylogenetic analyses  
224 confirmed the sister relationship between *K. uniflora* and *C. agrestis*, while resolving  
225 them as sister to the clade formed by Ranunculaceae and Berberidaceae, which is not  
226 congruent with previous placements of Circaeasteraceae and Lardizabalaceae as sister  
227 pairs (Kim et al., 2004; Wang et al., 2009; Sun et al., 2017). The close relationship  
228 between Ranunculaceae and Berberidaceae have been recognized in both previous  
229 and current phylogenies (e.g., Kim et al., 2004; Wang et al., 2009; Sun et al., 2017;  
230 Lane et al., 2018). However, in previous studies, either Papaveraceae (Hoot et al.,  
231 1999; Soltis et al., 2000) or Eupteleaceae (Kim et al., 2004; Wang et al., 2009; Sun et  
232 al., 2017; Lane et al., 2018) have been identified as the early-diverging clade sister to

233 other Ranunculales lineages. Although our phylogenetic analysis based on 264 genes  
234 agree with the placement of Eupteleacea as the early-diverging clade of Ranunculales  
235 (*Figure S6*), our 497 gene set analyses resolved Papaveraceae + Eupteleaceae as the  
236 early-diverging clade (*Figure 3*). With the accumulation of molecular evidence,  
237 conflict between gene trees is ubiquitous. Conflicting gene trees could be caused by  
238 multiple factors, such as hybridization/introgression, incomplete lineage sorting, gene  
239 duplication/loss and horizontal gene transfer (Zou and Ge, 2008; Lu et al., 2016).  
240 While considering the relatively far relationships among different Ranunculales  
241 families, gene duplication/loss is possibly a major contributor to the conflicting gene  
242 trees within Ranunculales. The divergence estimation between *K. uniflora* and *C.*  
243 *agrestis* (~51.8 mya) is consistent with a previous estimate of ~52 Mya (Ruiz-Sanchez  
244 et al., 2012), and also coincides with the timing of the first stage of  
245 Himalayan orogeny (Rowley, 1996; Huang et al., 2015). Similar to *K. uniflora*, *C.*  
246 *agrestis* also has a narrow distribution confined to China and the Himalayas. However,  
247 the distribution range of *Circaeaster* is relatively larger; in places where *Kingdonia*  
248 occur *Circaeaster* can always be found; while in most regions that *Circaeaster* is  
249 distributed *Kingdonia* is absent. Previous studies have shown that orogeny could  
250 create conditions favoring speciation of resident lineages (e.g., Hoorn et al., 2013;  
251 Wen et al., 2014; Favre et al., 2015). Hence, we hypothesize that the divergence  
252 between *K. uniflora* and *C. agrestis* was likely driven by the rapid uplift of  
253 contemporary Himalayan orogeny.

254 Asexual reproductive system and overrepresentation of DNA repair genes together  
255 reduce genetic diversity of *K. uniflora*. Levels of genetic diversity are often associated  
256 with reproductive strategies of species (Otálora et al., 2013). Colonization, population  
257 persistence, and extinction probabilities are all influenced by the reproductive systems  
258 of species (Stephenson et al., 2000; Babará et al., 2009; Wornik and Grube, 2010;  
259 Beatty and Provan 2011; Otálora et al., 2013). *Kingdonia uniflora* primarily  
260 reproduces asexually via rhizomes. This reproductive mode could produce identical  
261 individuals rapidly, but lacks recombination and the possibility to create genetic  
262 variation in offspring, reducing the opportunities for adaptive evolution (Eckert, 2001;

263 [Castonguay and Angers, 2012](#)). In addition, without segregation and recombination,  
264 the obligate asexual multiplication may push a species into extinction due to the  
265 steady accumulation of deleterious mutations ([Thomas et al., 2016](#)). During the  
266 long-term evolutionary history of *K. uniflora*, deleterious mutation accumulation  
267 cannot be ruled out; if something goes awry, such as the occurrence of a fatal  
268 mutation, whole clusters of clones can be wiped out. The integrated DNA-repair  
269 mechanism overrepresented in *K. uniflora* would allow it to reduce the accumulation  
270 of deleterious mutations. While, this DNA-repair system might also reduce genetic  
271 diversity produced by mutations. Having high genetic diversity is very important for  
272 plants to respond to environmental changes. We thus speculate the extremely narrow  
273 distribution range of *K. uniflora* is associated with low genetic diversity, which  
274 restricted suitable environments to simplex, equable habitats rather than multiple,  
275 divergent habitats. Specifically, *K. uniflora* can only live in high elevations with  
276 minor human disturbances, while being characterized by perennial cold temperatures  
277 of below zero degrees centigrade. The extreme temperature is likely to cause DNA,  
278 RNA, and protein damage. The overrepresentation of gene families for DNA-repair  
279 might also be one kind of protection from extremely low temperature.

280 Underrepresentation of genes associated with stress response in *K. uniflora* leads to  
281 degeneration of adaptive ability to environmental changes. Phenylpropanoids are  
282 believed to contribute to all aspects of plant responses towards biotic and abiotic  
283 stimuli ([Vogt, 2010](#)). As concluded by *La Camera et al. (2004)* when plants suffer  
284 environmental stress or pest diseases, phenylpropanoids could evoke relevant  
285 response mechanisms to protect plants from damage. Similarly, secondary metabolites  
286 also play a role in plant defense against environmental stresses and pest diseases  
287 ([Bennett and Wallsgrove, 1994](#)). Given the relatively stable ecological environment of  
288 *K. uniflora* and lack of habitat stress during growth, adaptation to such conditions  
289 resulted in the functional degeneration of stress response systems. In addition,  
290 phenylpropanoids can also promote invasion of new habitats ([Bais et al., 2003](#); [Vogt,](#)  
291 [2010](#)). Our results indicate the underrepresentation of gene families involved in  
292 phenylpropanoid biosynthesis, which might be one reason causing low ability of *K.*

293 *uniflora* to invade new habitats.

294 We conclude long-term living in highly equable habitats led to the  
295 underrepresentation of stress response genes, which finally resulted in loss of ability  
296 to adapt to other environments; while the asexual reproductive strategy promoted  
297 overrepresentation of DNA repair genes, which reduced genetic diversity associated  
298 with adaptive capacity to environmental changes. Hence, both of the  
299 underrepresentation of stress response genes and overrepresentation of DNA repair  
300 genes are responsible for the low adaptive ability of *K. uniflora*.

301 Equable habitats probably promoted dispensability of most *ndh* genes in *K. uniflora*.  
302 The *ndh* genes encode subunits of the thylakoid NADPH complex that mediates  
303 cyclic electron flow around Photosystem I and facilitates chlororespiration (Martín  
304 and Sabater, 2010). Most angiosperms contain 11 plastid *ndh* genes, whereas all *ndh*  
305 genes, except for *ndhE* and *ndhJ*, were found to be either pseudogenized (*ΨndhA*,  
306 *ΨndhB*, *ΨndhD*, *ΨndhH* and *ΨndhK*) or absent (*ndhC*, *ndhF*, *ndhI* and *ndhG*) in *K.*  
307 *uniflora* plastome (Sun et al., 2017). All 11 plastid *ndh* genes are intact in *C. agrestis*  
308 (Sun et al., 2017), indicating the loss of *ndh* genes from *K. uniflora* occurred after the  
309 split between *K. uniflora* and *C. agrestis*; suggesting that within 52 million years most  
310 of the plastid *ndh* genes were lost from *K. uniflora* not only in the plastome but also in  
311 the nuclear genome. Among land plants, the plastid *ndh* loci have also been found  
312 absent in non-photosynthetic plants, epiphytes, Gnetales, conifers and *Erodium*  
313 (Geraniaceae) (Kim et al., 2015; Lin et al., 2017; Ni et al., 2017). Evidence suggests  
314 that the thylakoid NADPH complex could optimize photosynthesis for plants under  
315 environmental stresses; while being found dispensable for plant growth under optimal  
316 growth conditions (Martín and Sabater, 2010). *Kingdonia uniflora* is extremely  
317 selective in habitat preference, and is known as the indicator for natural ecological  
318 environment without disturbance. A series of studies suggests that the *ndh* genes can  
319 be dispensable under mild non-stressing environments (e.g., Casano et al., 2001;  
320 Martín et al., 2004; Rumeau et al., 2007; Martín and Sabater, 2010). We hence  
321 speculate that the current habitats of *K. uniflora* might have promoted the  
322 dispensability of the plastid *ndh* genes. Additionally, within plants, NADPH supplies



323 hydrogen for many anabolism processes (Antal et al., 2015). The underrepresentation  
324 of gene families related to metabolic pathways, as detected from our CAFÉ based  
325 analyses, is likely related with the nonfunction state of plastid *ndh* genes.

326 Changing climate, shrinking habitats and low adaptive ability to environmental  
327 changes together contributed to the extremely narrow distribution of *K. uniflora*. The  
328 overrepresentation of gene families involved in DNA repair could help reduce the  
329 accumulation of deleterious mutations during asexual reproduction, which is the  
330 dominate mode of reproduction in *K. uniflora*, while at the same time, reducing  
331 genetic diversity which is important in responding to environment fluctuations. The  
332 underrepresentation of gene families in charge of stress response and nonfunction of  
333 plastid *ndh* genes are could be due to the adaptive degeneration caused by long-term  
334 adaptation to living in relatively stress free environments. Considering the long  
335 evolutionary history of *K. uniflora*, and the fossil records from *C. agrestis* in the  
336 mid-Albian of Virginia, USA (Crane et al., 1994; Drinna et al., 1994), we speculate it  
337 should have been widespread around the world. Changing climate, shrinking habitats,  
338 asexual reproduction, and adaptive degeneration caused by relying on easeful  
339 environment together lead it to a current status of endangerment.

340

## 341 **Methods**

### 342 **Plant materials and sequencing**

343 Fresh *K. uniflora* leaves were collected from individuals growing from the same  
344 rhizome in the Taibai Mountains (altitude 2,844 m, N 34.038°, E107.715°), Shaanxi,  
345 China. Total genomic DNA ( $\geq 10$  ug,  $\geq 50$  ng/ul) was isolated from fresh leaves using  
346 the conventional cetyltriethylammonium bromide (CTAB) method (Doyle and Doyle,  
347 1987). For Illumina sequencing, two paired-end sequencing libraries with insert sizes  
348 of 270 bp and 500 bp, respectively, were constructed and sequenced on the Illumina  
349 HiSeq X ten platform (Illumina Inc., CA, USA) at Beijing Genomics Institute (BGI)  
350 in Wuhan, Hubei, China. For PacBio single-molecule real-time sequencing,  
351 sequencing libraries with 20-kb DNA inserts were constructed and sequenced on the



352 PacBio Sequel platform (Pacific Biosciences, CA, USA) at BGI. We also collected  
353 fresh leaves of *C. agrestis* in Taibai Mountains (altitude 2,837m, N34.038°, E107.68)  
354 for RNA extraction. Total RNA was extracted from young leaves (~100 mg) of both *K.*  
355 *uniflora* and *C. agrestis* using TRIzol Reagent RNA Purification (DSB, Guangdong,  
356 China). A cDNA library with insert sizes of 350-400 bp was prepared using NEBNext  
357 Ultra RNA Library Prep Kit for Illumina (NEB, MA, USA) and paired-end sequenced  
358 on the HiSeq X ten platform (Illumina Inc., CA, USA) at BGI.

359

### 360 *De novo* assembly

361 The PacBio long reads were first corrected and *de novo* assembled using Canu v1.8  
362 (Koren et al., 2017) with default parameters except for setting the genome size to 1.2  
363 G to obtain contigs. Then iterative polishing was conducted on the Canu derived  
364 contigs using Pilon v1.2.3 (Walker et al., 2014) in which adapter-trimmed  
365 paired-end Illumina reads from DNA sequencing were aligned with the raw assembly  
366 with default parameters to fix bases and correct local misassemblies. RNA-seq reads  
367 were assembled into transcripts using Trinity v2.6.6 (Grabherr et al., 2011) with the  
368 paired-end option and remaining default parameters.

369

### 370 Annotation of repetitive sequences

371 We identified *de novo* repetitive sequences in the *K. uniflora* genome using  
372 RepeatModeler (<http://www.repeatmasker.org/RepeatModeler/>) based on a self-blast  
373 search. We further used RepeatMasker (<http://www.repeatmasker.org/>) to search for  
374 known repetitive sequences using a cross-match program with a Repbase-derived  
375 RepeatMasker library and the *de novo* repetitive sequences constructed by  
376 RepeatModeler. Intact LTR (long terminal repeat) retrotransposons were identified by  
377 searching the genome of *K. uniflora* with LTRharvest (Ellinghaus et al., 2008) (-motif  
378 tgca -motifmis 1) and LTR\_Finder (Xu and Wang, 2007) (-D 20000 -d 1000 -L 5000  
379 -I 100). We combined results from both analyses and filtered false positives using  
380 LTR\_retriever (Qu and Jiang, 2017), which also calculated the insertion date (*t*) for

381 each LTR retrotransposons ( $t = K/2r$ , K: genetic distance) using a substitution rate ( $r$ )  
382 of  $1.4 \times 10^{-9}$  substitutions per site per year calculated by MCMCtree in PAML (Yang,  
383 2007).

384

### 385 Structural and functional annotation of genes

386 Putative protein-coding gene structures in the *K. uniflora* genome were homology  
387 predicted using the Maker package v2.31.10 (Holt and Yandell, 2011) with protein  
388 references from the published Ranunculales genomes and the *de novo* assembled  
389 transcripts of *K. uniflora* transcriptome data generated in this study, and *de novo*  
390 predicted using Augustus v3.3.2 (Stanke et al., 2006). The rRNAs were predicted  
391 using RNAmmer v1.2 (Lagesen et al., 2007), tRNAs were predicted using  
392 tRNAscan-SE v1.4 (Lowe and Eddy, 1997), and other noncoding RNA sequences  
393 were identified using Rfam v12.0 by inner calling using Infernal v1.1.2 (Nawrocki  
394 and Eddy, 2013).

395 Functional annotation of the protein-coding genes was carried out by performing  
396 BLASTP analyses (e-value cut-off  $1e-05$ ) against the NCBI nonredundant protein  
397 sequence database and SwissProt. Searches for gene motifs and domains were  
398 performed using InterProScan v5.16.55 (Jones et al., 2014). Completeness of the  
399 genome was assessed by performing gene annotation using the BUSCO (v3.0.2)  
400 methods (Simão et al, 2015) by searching the Embryophyta library..

### 401 Investigation of whole-genome duplication

402 We identified paralogs (within *K. uniflora* and *C. agrestis*, respectively) and orthologs  
403 (between *K. uniflora* and *C. agrestis*) using BLASTP (E value =  $1E-07$ ). For each  
404 gene pair, the number of synonymous substitutions per synonymous site ( $K_s$ ) based  
405 on the NG method was calculated using TBtools (Chen et al., 2018);  $K_s$  values of all  
406 gene pairs were plotted to identify putative whole-genome duplication events. In  
407 addition, MCScanx (Wang et al., 2012) was used to identify syntenic blocks within  
408 the *K. uniflora* genome. Dot-plot analysis of syntenic blocks with at least five gene  
409 pairs was conducted using the dot plotter program within the MCScanX package to

410 further detect whole-genome duplication events.

411

## 412 Gene family and phylogenomic analysis

413 Orthogroups were constructed using eight genome sequences and four transcriptome  
414 sequences (Table S10). CD-HIT ([Huang et al., 2010](#)) was employed to remove  
415 redundancy caused by alternative splicing variations (-c 0.8 -aS 0.8). To exclude  
416 putative fragmented genes, genes encoding protein sequences shorter than 50 aa  
417 (amino acids) were filtered out. All filtered protein sequences of 12 species were  
418 compared with each other using BLASTP (E value = 1E-5) and clustered into  
419 orthologous groups by OrthoFinder ([Emms and Kelly, 2015](#)). Protein sequences of  
420 single-copy gene families identified by OrthoFinder were used for phylogenetic tree  
421 construction. MAFFT version 7.0 ([Katoh and Standley, 2013](#)) was used to generate  
422 multiple sequence alignment for protein sequences in each single-copy family. Poorly  
423 aligned regions were further trimmed using the Gblocks ([Castresana, 2000; Talavera  
424 and Castresana, 2007](#)). The alignments of each gene family were concatenated to a  
425 super alignment matrix, which was then used for phylogenetic tree reconstruction  
426 through the PROTCATJTT model in RAxML version 8.1.2 ([Stamatakis, 2014](#)). To  
427 assess species tree clade support, a coalescent-based analysis was also conducted  
428 using RAxML bootstrap gene trees as input for ASTRAL v. 4.7.6 ([Mirarab et al.,  
429 2015](#)). A second data set consisting of 17 taxa was also used following the same steps  
430 which consisted of increased taxonomic sampling with the tradeoff of fewer loci.

431 Divergence time between 12 species was estimated using MCMCtree in PAML  
432 ([Yang, 2007](#)) with the options “independent rates” and “HKY85” model. A Markov  
433 chain Monte Carlo analysis was run for 100,000,000 generations, using a burn-in of  
434 1,000 iterations. Two constraints were used for time calibrations: (1) 140–150 Mya  
435 for the monocot-dicot split ([Gaut et al., 1996; Yang et al., 2018](#)); 112-124 Mya for the  
436 Ranunculales crown group ([Magallón et al., 2015; Sun et al., 2018](#)).

437

## 438 Gene family overrepresentation and underrepresentation

439 Overrepresentation and underrepresentation of the OrthoFinder-derived orthologous  
440 gene families were determined using CAFÉ v. 4.1 (De Bie et al., 2006). For each  
441 significantly overrepresented and underrepresented gene family in *K. uniflora*,  
442 functional information was inferred via KOBAS  
443 ([http://kobas.cbi.pku.edu.cn/anno\\_iden.php](http://kobas.cbi.pku.edu.cn/anno_iden.php)) using KEGG Pathway database.

#### 444 Plastid *ndh* gene searching

445 Intact sequences of all (11) plastid *ndh* genes, including *ndhA*, *ndhB*, *ndhC*, *ndhD*,  
446 *ndhE*, *ndhF*, *ndhG*, *ndhH*, *ndhI*, *ndhJ* and *ndhK*, were extracted from the plastome of  
447 *C. agrestis*<sup>10</sup>. Then BLASTN analyses (E value = 1E-5) between the 11 gene  
448 sequences and assembled *K. uniflora* genome sequences was conducted.

449

#### 450 **Acknowledgements**

451 This work was supported by the Strategic Priority Research Program of  
452 Chinese Academy of Sciences (XDA20050203), the Programme Foundation for the  
453 Backbone of Scientific Research by Wuhan Botanical Garden, Chinese Academy of  
454 Sciences (Y855241G01), the Major Program of National Natural Science Foundation  
455 of China (31590823), and the National Key R and D Program of China  
456 (2017YFC0505200).

457

#### 458 **References**

459 Angiosperm Phylogeny Group. (2016). An update of the angiosperm phylogeny group  
460 classification for the orders and families of flowering plants: APG IV. Bot. J.  
461 Linn. Soc. 181:1-20.

462 Antal, T.K., Krendeleva, T.E., and Tyystjärvi, E. (2015). Multiple regulatory  
463 mechanisms in the chloroplast of green algae: relation to hydrogen production.  
464 Photosynth. Res. 125:357-381.

465 Bais, H.P., Vepachedu, R., Gilroy, S., Callaway, R.M., and Vivanco, J.M. (2003).  
466 Allelopathy and exotic plant invasion: from molecules and genes to species  
467 interactions. Science 301:1377-1380.

- 468   Barbará, T., Martinelli, G., Palma-Silva, C., Fay, M. F., Mayo, S., and Lexer, C.  
469       (2009). Genetic relationships and variation in reproductive strategies in four  
470       closely related bromeliads adapted to neotropical ‘inselbergs’ : *Alcantarea*  
471       *glaziouana*, *A. regina*, *A. geniculata* and *A. imperialis* (Bromeliaceae). *Ann. Bot.*  
472       103:65-77.
- 473   Beatty, G.E., and Provan, J. (2011). High clonal diversity in threatened peripheral  
474       populations of the yellow bird’ s nest (*Hypopitys monotropa*; syn. *Monotropa*  
475       *hypopitys*). *Ann. Bot.* 107:663-670.
- 476   Bell, G., and Collins, S. (2008). Adaptation, Extinction and Global Change. *Evol.*  
477       *Appl.* 1:3-16.
- 478   Bennett, R.N. and Wallsgrave, R.M. (1994). Secondary Metabolites in Plant Defense  
479       Mechanisms. *New Phytology* 127:617-633.
- 480   Casano, L.M., Martín, M., and Sabater, B. (2001). Hydrogen peroxide mediates the  
481       induction of chloroplast Ndh complex under photooxidative stress in barley.  
482       *Plant Physiol.* 125:1450e1458.
- 483   Castonguay, E., and Angers, B. (2012). The Key Role of Epigenetics in the  
484       Persistence of Asexual Lineages. *Genetics Research International* 2012, 1-9.
- 485   Castresana, J. (2000). Selection of conserved blocks from multiple alignments  
486       for their use in phylogenetic analysis. *Mol. Biol. Evol.* 17:540-552.
- 487   Chen, C., Chen, H., He, Y.H., and Xia, R. TBtools, a Toolkit for Biologists integrating  
488       various biological data handling tools with a user-friendly interface. DOI:  
489       <https://doi.org/10.1101/289660> (2018)
- 490   Clark, M.K., House, M. A., Royden, L. H., Whipple, K., Burchfiel, B. C., Zhang, X.,  
491       and Tang, W. (2005). Late Cenozoic uplift of southeastern Tibet. *Geology* 33:  
492       525-528.
- 493   Crane, P.R., Friis, E.M., and Pedersen, K.R. (1994). Paleobotanical evidence on the  
494       early radiation of magnoliid angiosperms. *Plant Syst. Evol.* 8:51-72.
- 495   De Bie, Cristianini, N., Demuth, J.P., and Hahn, M.W. (2006). CAFÉ: a computational  
496       tool for the study of gene family evolution. *Bioinformatics* 22:1269-1271.
- 497   Doyle, J.J., and Doyle, J.L. (1987). A rapid DNA isolation procedure for small

- 498 quantities of fresh leaf tissue. *Phytochem Bull* 19:11-15.
- 499 Drinnan, A.N., Crane, P.R., and Hoot, S.B. (1994). Patterns of floral evolution in the  
500 early diversification of non-magnoliid dicotyledons (eudicots). *Plant Syst. Evol.*  
501 8:93-122.
- 502 Eckert, C.G. (2001). The loss of sex in clonal plants. *Evol. Ecol.* 15:501-520.
- 503 El Baidouri, M., and Panaud, O. (2013). Comparative genomic paleontology across  
504 plant kingdom reveals the dynamics of TE-driven genome evolution. *Genome*  
505 *Biol. Evol.* 5:954-65.
- 506 Ellinghaus, D., Kurtz, S., and Willhoeft, U. (2008). LTRharvest, an efficient and  
507 flexible software for de novo detection of LTR retrotransposons. *BMC*  
508 *Bioinformatics* 9:18.
- 509 Emms, D.M., and Kelly, S. (2015). OrthoFinder: solving fundamental biases in whole  
510 genome comparisons dramatically improves orthogroup inference accuracy.  
511 *Genome Biol.* 16:157.
- 512 Favre, A., Päckert, M., Pauls, S. U., Jähnig, S. C., Uhl, D., Michalak, I., and  
513 Muellner-Riehl, A. N. (2015). The role of the uplift of the Qinghai-Tibetan  
514 Plateau for the evolution of Tibetan biotas. *Biol. Rev.* 90:236-253.
- 515 Garner, B.A., Hand, B. K., Amish, S.J., Bernatchez, L., Foster, J.T., Miller, K.M.,  
516 Morin, P.A., Narum, S.R., O'Brien, S.J., Roffler, G., et al. (2016). Genomics in  
517 Conservation: Case studies and bridging the gap between data and application.  
518 *Trends Ecol. Evol.* 31:81-83.
- 519 Gaut, B.S., Morton, B.R., McCaig, B.C., and Clegg, M.T. (1996). Substitution rate  
520 comparisons between grasses and palms: synonymous rate differences at the  
521 nuclear gene *Adh* parallel rate differences at the plastid gene *rbcL*. *Proc. Natl.*  
522 *Acad. Sci.* 93:10274-10279.
- 523 Grabherr, M.G., Haas, B.J., Yassour, M., Levin, J.Z., Thompson, D.A., Amit, I.,  
524 Adiconis, X., Fan, L., Raychowdhury, R., Zeng, Q., et al. (2011). Full-length  
525 transcriptome without a genome from RNA-Seq data. *Nat. Biotechnol.*  
526 29:644-652.
- 527 Holt, C., and Yandell, M. (2011). MAKER2: an annotation pipeline and

- 528 genome-database management tool for second-generation genome projects. *BMC*  
529 *Bioinformatics* 12:491.
- 530 Hoorn, C., Mosbrugger, V., Mulch, A., and Antonelli, A. (2013). Biodiversity from  
531 mountain building. *Nat. Geosci.* 6:154-154.
- 532 Hoot, S.B., Magallón, S., and Crane, P.R. (1999). Phylogeny of basal eudicots based  
533 on three molecular data sets: *atpB*, *rbcL*, and 18S nuclear ribosomal DNA  
534 sequences. *Ann. Missouri. Bot. Gard.* 86:1-32.
- 535 Huang, W., van Hinsbergen, D. J.J., Lippert, P.C., Guo, Z., and Dupont-Nivet, G.  
536 (2015). Paleomagnetic tests of tectonic reconstructions of the India-Asia  
537 collision zone. *Geophys. Res. Lett.* 42:2642-2649.
- 538 Huang, Y., Niu, B., Gao, Y., Fu, L., and Li, W. (2010). CD-HIT Suite: a web server for  
539 clustering and comparing biological sequences. *Bioinformatics* 26:680.
- 540 Jones, P., Binns, D., Chang, H.-Y., Fraser, M., Li, W., McAnulla, C., McWilliam, H.,  
541 Maslen, J., Mitchell, A., Nuka, G., et al. (2014). InterProScan 5: genome-scale  
542 protein function classification. *Bioinformatics* 30:1236-1240.
- 543 Katoh, K., and Standley, D.M. (2013). MAFFT multiple sequence alignment software  
544 version 7: improvements in performance and usability. *Mol. Biol. Evol.*  
545 30:772-780.
- 546 Kim, H.T., Kim, J.S., Moore, M.J., Neubig, K.M., Williams, N.H., Whitten, W.M.,  
547 and Kim, J.-H. (2015). Seven new complete plastome sequences reveal rampant  
548 independent loss of the *ndh* gene family across Orchids and associated instability  
549 of the inverted repeat/small single-copy region boundaries. *PLoS ONE* 10:  
550 e0142215.
- 551 Kim, S., Soltis, D.E., Soltis, P.S., Zanis, M.J., and Suh, Y. (2004). Phylogenetic  
552 relationships among early-diverging eudicots based on four genes: were the  
553 eudicots ancestrally woody? *Mol. Phylogenet. Evol.* 31:16-30.
- 554 Kirby, E., Reiners, P.W., Krol, M.A., Whipple, K.X., Hodges, K.V., Farley, K.A., Tang,  
555 W.Q., and Chen, Z. (2002). Late Cenozoic evolution of the eastern margin of the  
556 Tibetan Plateau: Inferences from <sup>40</sup>Ar/<sup>39</sup>Ar and (U-Th)/He thermochronology.  
557 *Tectonics* 21:1-20.



- 558 Koren, S. Walenz, B.P., Berlin, K., Miller, J.R., Bergman, N.H., and Phillippy, A.M.  
559 (2017). Canu: scalable and accurate long-read assembly via adaptive k-mer  
560 weighting and repeat separation. *Genome Res.* 27:722-736.
- 561 La Camera, S., Gouzerh, G., Dhondt, S., Hoffmann, L., Fritig, B., Legrand, M., and  
562 Heitz, T. (2004). Metabolic reprogramming in plant innate immunity: the  
563 contributions of phenylpropanoid and oxylipin pathways. *Immunol. Rev.* 198,  
564 267-284.
- 565 Lagesen, K., Hallin, P., Rødland, E. A., Stærfeldt, H.-H., Rognes, T., and Ussery, D.W.  
566 (2007). RNAmmer: consistent and rapid annotation of ribosomal RNA genes.  
567 *Nucleic Acids Res.* 35:3100-3108.
- 568 Landis, J. B., Soltis, D. E., Li, Z., Marx, H. E., Barker, M. S., Tank, D. C., and Soltis,  
569 P. S. (2018). Impact of whole-genome duplication events on diversification rates  
570 in angiosperms. *Am. J. Bot.* 105:348-363.
- 571 Lane, A.K., Augustin, M.M., Ayyampalayam, S., Plant A., Gleissberg, S., Di Stilio,  
572 V.S., Depamphilis, C.W., Wong, G.K., Kutchan, T.M., and Leebens-Mack, J.H.  
573 (2018). Phylogenomic analysis of Ranunculales resolves branching events across  
574 the order. *Bot. J. Linn. Soc.* 187:157-166.
- 575 Lin, C.-S., Chen, J. J. W., Chiu, C.-C., Hsiao, H. C. W., Yang, C.-J., Jin, X.-H.,  
576 Leebens-Mack, J., de Pamphilis, C.W., Huang, Y-T., Yang, L-H., et al. (2017).  
577 Concomitant loss of NDH complex-related genes within chloroplast and nuclear  
578 genomes in some orchids. *Plant J.* 90:994-1006.
- 579 Lowe, T.M., and Eddy, S.R. (1997). tRNAscan-SE: a program for improved detection  
580 of transfer RNA genes in genomic sequence. *Nucleic Acids Res.* 25:955-964.
- 581 Lu, L.M., Chen, Z.D., and Lu, A.M. (2016). Will there ever be a tree of life that  
582 systematists can agree on? *Chinese Sci. Bull.* 61:958-963.
- 583 Magallón, S., Gómez-Acevedo, S., Sánchez-Reyes, L.L., and Hernández-Hernández,  
584 T. (2015). A metacalibrated time-tree documents the early rise of flowering plant  
585 phylogenetic diversity. *New Phytol.* 207:437-453.
- 586 Martín, M., and Sabater, B. (2010). Plastid *ndh* genes in plant evolution. *Plant Physiol.*  
587 *Bioch.* 48:636e645.



- 588 Martin, M., Casano, L.M., Zapata, J.M., Guera, A., del Campo, E.M.,  
589 Schmitz-Linneweber, C., Maier, R.M., and Sabater, B. (2004). Role of thylakoid  
590 Ndh complex and peroxidase in the protection against photo-oxidative stress:  
591 fluorescence and enzyme activities in wild-type and *ndhF*-deficient tobacco.  
592 *Physiol. Plant.* 122:443e452.
- 593 Meng, K., Wang, E., and Wang, G. (2016). Uplift of the Emei Shan, western Sichuan  
594 Basin: Implication for eastward propagation of the Tibetan Plateau in Early  
595 Miocene. *J. Asian Earth. Sci.* 115:29-39.
- 596 Michael, T.P. (2014). Plant genome size variation: bloating and purging DNA. *Brie.*  
597 *Funct. Genomics* 13:308-317.
- 598 Mirarab, S., and Warnow, T. (2015). ASTRAL-II: coalescent-based species tree  
599 estimation with many hundreds of taxa and thousands of genes. *Bioinformatics*  
600 31:44–52.
- 601 Nawrocki, E.P., and Eddy, S.R. (2013). Infernal 1.1: 100-fold faster RNA homology  
602 searches. *Bioinformatics* 29:2933-2935.
- 603 Nie, Z.X., Ye, Y.J., Bai, T.D., Xu, M., and Xu, L-A. (2017). Complete Chloroplast  
604 Genome of *Pinus massoniana*(Pinaceae): Gene Rearrangements, Loss  
605 of *ndh*Genes, and Short Inverted Repeats Contraction, Expansion. *Molecules* 22:  
606 1528.
- 607 Otálora, M.A.G., Salvador, C., Martínez, I., and Aragón, G. (2013). Does the  
608 reproductive strategy affect the transmission and genetic diversity of bionts in  
609 cyanolichens? A case study using two closely related species. *Microb. Ecol.* 65:  
610 517-530.
- 611 Qu, S.J., and Jiang, N. (2018). LTR\_retriever: A Highly Accurate and Sensitive  
612 Program for Identification of Long Terminal Repeat Retrotransposons. *Plant*  
613 *Physiol.* 176:1410-1422.
- 614 Rowley, D.B. (1996). Age of initiation of collision between India and Asia: a review  
615 of stratigraphic data. *Earth Planet. Sc. Lett.* 145:1-13.
- 616 Ruiz-Sanchez, E., Rodriguez-Gomez, F., and Sosa, V. (2012). Refugia and geographic  
617 barriers of populations of the desert poppy, *Hunnemannia fumariifolia*

- 618 (Papaveraceae). *Org. Divers. Evol.* 12:133-143.
- 619 Rumeau, D., Peltier, G., and Cornac, L. (2007). Chlororespiration and cyclic electron  
620 flow around PSI during photosynthesis and plant stress response. *Plant Cell*  
621 *Environ.* 30:1041e1051.
- 622 Shafer, A.B.A., Wolf, J.B.W., Alves, P.C., Bergström, L., Bruford, M.W., Brännström,  
623 I., Colling, Guy., Dalén, L., De Meester, L., Ekblom, R., et al. (2015). Genomics  
624 and the challenging translation into conservation practice. *Trends Ecol. Evol.*  
625 30:78-87.
- 626 Simão, F.A., Waterhouse, R.M., Ioannidis, P., Kriventseva, E.V., and Zdobnov, E.M.  
627 (2015). BUSCO: Assessing genome assembly and annotation completeness with  
628 single-copy orthologs. *Bioinformatics* 31:3210-3212.
- 629 Soltis, D.E., Soltis, P.S., and Chase, M.W. (2000). Angiosperm phylogeny inferred  
630 from 18S rDNA and *atpB* sequences. *Bot. J. Linn. Soc.* 133:381-461.
- 631 Stamatakis, A., Ludwig, T., and Meier, H. (2004). RAxML-III: A fast program  
632 for maximum likelihood-based inference of large phylogenetic trees.  
633 *Bioinformatics* 21:456-463.
- 634 Stanke, M., Keller, O., Gunduz, I., Hayes, A., Waack, S., and Morgenstern, B. (2006).  
635 AUGUSTUS: ab initio prediction of alternative transcripts. *Nucleic Acids Res.*  
636 34:W435-W439.
- 637 Stephenson, A.G., Good, S.V., and Vogler, D.W. (2000). Interrelationships among  
638 inbreeding depression, plasticity in the self-incompatibility system, and the  
639 breeding system of *Campanula rapunculoides* L. (Campanulaceae). *Ann. Bot.* 85:  
640 211-219.
- 641 Sun, B.-N., Wu, J.-Y., Liu, Y.-S. (Christopher), Ding, S.-T., Li, X.-C., Xie, S.-P., Yan,  
642 D.-F., and Lin, Z.-C. (2011). Reconstructing Neogene vegetation and climates to  
643 infer tectonic uplift in western Yunnan, China. *Palaeogeogr. Palaeoclimatol.*  
644 *Palaeoecol.* 304:328-336.
- 645 Sun, Y., Moore, M. J., Lin, N., Adelalu, K. F., Meng, A., Jian, S., Yang, L.S., Li, J.Q.,  
646 and Wang, H. (2017). Complete plastome sequencing of both living species of  
647 *Circaeasteraceae* (Ranunculales) reveals unusual rearrangements and the loss of

- 648 the *ndh* gene family. BMC Genomics 18:592.
- 649 Sun, Y., Moore, M. J., Landis, J. B., Lin, N., Chen, L., Deng, T., Zhang, J.W., Meng,  
650 A.P., Zhang, S.J., Tojibaev, O.S., et al. (2018). Plastome phylogenomics of the  
651 early-diverging eudicot family Berberidaceae. Mol. Phylogenet. Evol.  
652 128:203-211.
- 653 Talavera, G., and Castresana, J. (2007). Improvement of phylogenies after removing  
654 divergent and ambiguously aligned blocks from protein sequence alignments.  
655 Systematic Biol. 56:564-577.
- 656 Tenailon, M.I., Hollister, J.D., and Gaut, B.S. (2010). A triptych of the evolution of  
657 plant transposable elements. Trends Plant Sci. 15:471-8.
- 658 Thomas, G. E., Geetha, K. A., Augustine, L., Mamiyil, S., and Thomas, G. (2016).  
659 Analyses between reproductive behavior, genetic diversity and pythium  
660 responsiveness in *Zingiber* spp. reveal an adaptive significance for hemiclinality.  
661 Front. Plant Sci. 7:1913.
- 662 Vogt, T. (2010). Phenylpropanoid biosynthesis. Mol. Plant 3:2-20.
- 663 Walker, B. J., Abeel, T., Shea, T., Priest, M., Abouelliel, A., Sakthikumar, S., Cuomo,  
664 C.A., Zeng, Q., Wortman, J., Young, S.K., et al. (2014). Pilon: an integrated tool  
665 for comprehensive microbial variant detection and genome assembly  
666 improvement. PLoS One 9:e112963.
- 667 Wang, E., Kirby, E., Furlong, K. P., van Soest, M., Xu, G., Shi, X., Kamp, P.J.J., and  
668 Hodges, K. V. (2012). Two-phase growth of high topography in eastern Tibet  
669 during the Cenozoic. Nat. Geosci. 5:640-645.
- 670 Wang, P., Scherler, D., Liu-Zeng, J., Mey, J., Avouac, J.-P., Zhang, Y., and Shi, D.  
671 (2014). Tectonic control of Yarlung Tsangpo Gorge revealed by a buried canyon  
672 in Southern Tibet. Science 346:978-981.
- 673 Wang, W., Lu, A.-M., Ren, Y., Endress, M. E., and Chen, Z.-D. (2009). Phylogeny and  
674 classification of Ranunculales: Evidence from four molecular loci and  
675 morphological data. Perspect. Plant Ecol. 11:81-110.
- 676 Wang, Y., Tang, H., DeBarry, J. D., Tan, X., Li, J., Wang, X., Lee, T., Jin, H., Marler,  
677 B., Guo, H., et al. (2012). MCSanX: A toolkit for detection and evolutionary

- 678 analysis of gene synteny and collinearity. *Nucleic Acids Res.* 40:e49.
- 679 Wen, J., Zhang, J.-Q., Nie, Z.-L., Zhong, Y., and Sun, H. (2014). Evolutionary  
680 diversifications of plants on the Qinghai-Tibetan Plateau. *Front. Genet.* 5, 1-16.
- 681 Wicker, T., Sabot, F., Hua-Van, A., Bennetzen, J. L., Capy, P., Chalhoub, B., Flavell,  
682 A., Leroy, P., Morgante, M., Panaud, O., et al. (2007). A unified classification  
683 system for eukaryotic transposable elements. *Nat. Rev. Genet.* 8:973-82.
- 684 Windig, J.J., and Engelsma, K.A. (2010). Perspectives of genomics for genetic  
685 conservation of livestock. *Conserv. Genet.* 11:635-641.
- 686 Wornik, S., and Grube, M. (2010). Joint dispersal does not imply maintenance of  
687 partnerships in lichen symbioses. *Microb. Ecol.* 59:150-157.
- 688 Xing, Y., and Ree, R.H. (2017). Uplift-driven diversification in the Hengduan  
689 Mountains, a temperate biodiversity hotspot. *Proc. Natl. Acad. Sci.*  
690 114:E3444-E3451 .
- 691 Xu, Z., and Wang, H. (2007). LTR\_FINDER: An efficient tool for the prediction of  
692 full-length LTR retrotransposons. *Nucleic Acids Res.* 35:W265-W268.
- 693 Yang, Y., Ma, T., Wang, Z., Lu, Z., Li, Y., Fu, C., Chen, X., Zhao, M., Olson, M.S.,  
694 and Liu, J. (2018). Genomic effects of population collapse in a critically  
695 endangered ironwood tree *Ostrya rehderiana*. *Nature Communications* 9:5449.
- 696 Yang, Z. (2007). PAML 4: Phylogenetic analysis by maximum likelihood. *Mol. Biol.*  
697 *Evol.* 24:1586-1591.
- 698 Zou, X., and Ge, S. (2008). Conflicting gene trees and phylogenomics. *J. Syst. Evol.*  
699 46:795-807.

700

701

702

703 Table 1 Genome assembly of *Kingdonia uniflora*.

| Genome features         | Contigs/Scaffolds |
|-------------------------|-------------------|
| Total length, bp        | 1,004,656,313     |
| Total number of contigs | 2932              |
| Longest length, bp      | 11,531,354        |
| Length of N50, bp       | 2,099,369         |
| Length of N90, bp       | 292,588           |
| GC content, %           | 38.04 %           |
| No. of genes            | 43,301            |

704

705

706

707

708

709

710

711

712

713

714 Table 2 Functional annotation of the significantly overrepresented and underrepresented gene families in *Kingdonia uniflora*

| Gene Families                  | KEGG Terms                                    | Input no. | Background no. | <i>P</i> -value | Corrected <i>P</i> -value |
|--------------------------------|-----------------------------------------------|-----------|----------------|-----------------|---------------------------|
| Overrepresented gene families  | Glycosphingolipid biosynthesis - globo series | 9         | 9              | 5.28E-07        | 1.59E-05                  |
|                                | Homologous recombination                      | 17        | 56             | 2.87E-06        | 6.74E-05                  |
|                                | Mismatch repair                               | 12        | 39             | 7.31E-05        | 0.000968079               |
|                                | Sphingolipid metabolism                       | 9         | 26             | 0.000282866     | 0.003082136               |
|                                | DNA replication                               | 12        | 50             | 0.000516123     | 0.005446878               |
|                                | Nucleotide excision repair                    | 14        | 69             | 0.000789672     | 0.007779277               |
|                                | Peroxisome                                    | 16        | 87             | 0.000878589     | 0.008505414               |
|                                | Galactose metabolism                          | 12        | 55             | 0.001064483     | 0.010034842               |
|                                | Plant hormone signal transduction             | 33        | 271            | 0.002344688     | 0.020456082               |
| Underrepresented gene families | Cyanoamino acid metabolism                    | 5         | 60             | 2.06E-09        | 1.57E-07                  |
|                                | Phenylpropanoid biosynthesis                  | 5         | 157            | 2.06E-07        | 6.24E-06                  |
|                                | Starch and sucrose metabolism                 | 5         | 202            | 6.95E-07        | 1.96E-05                  |
|                                | Biosynthesis of secondary metabolites         | 6         | 1,076          | 0.00020813      | 0.001073645               |

---

|                    |   |       |             |             |
|--------------------|---|-------|-------------|-------------|
| Metabolic pathways | 6 | 1,910 | 0.004094269 | 0.015173186 |
|--------------------|---|-------|-------------|-------------|

---

715

716

717 **Figure 1.** Comparative analyses of genomic features between *Kingdonia uniflora* and  
718 *Aquilegia coerulea*. Tracks from inside to outside are collinearity between both  
719 genomes, number of chromosomes/scaffolds, gene density, GC content and TE  
720 density.

721 **Figure 2A.** Insertion time distribution of LTR retrotransposons.

722 **Figure 2B.** Distribution of synonymous substitution rates ( $K_s$ ) for pairs of  
723 paralogs/orthologs in/between *K. uniflora* and *C. agrestis*.

724 **Figure 2C.** Dot plots of paralogs identified across contigs in the *K. uniflora* genome.

725 **Figure 2D.** Venn diagram showing unique and shared gene families between  
726 genomes of *K. uniflora* and four other Ranunculales species.

727 **Figure 3.** Dated phylogeny for 12 plant species with *Oryza* as an outgroup. A time  
728 scale is shown at the bottom, and red points in some nodes indicate fossil  
729 calibration points.

730 **Figure 4.** Length comparison of *ndh* genes between *K. uniflora* and *C. agrestis*.

731

732



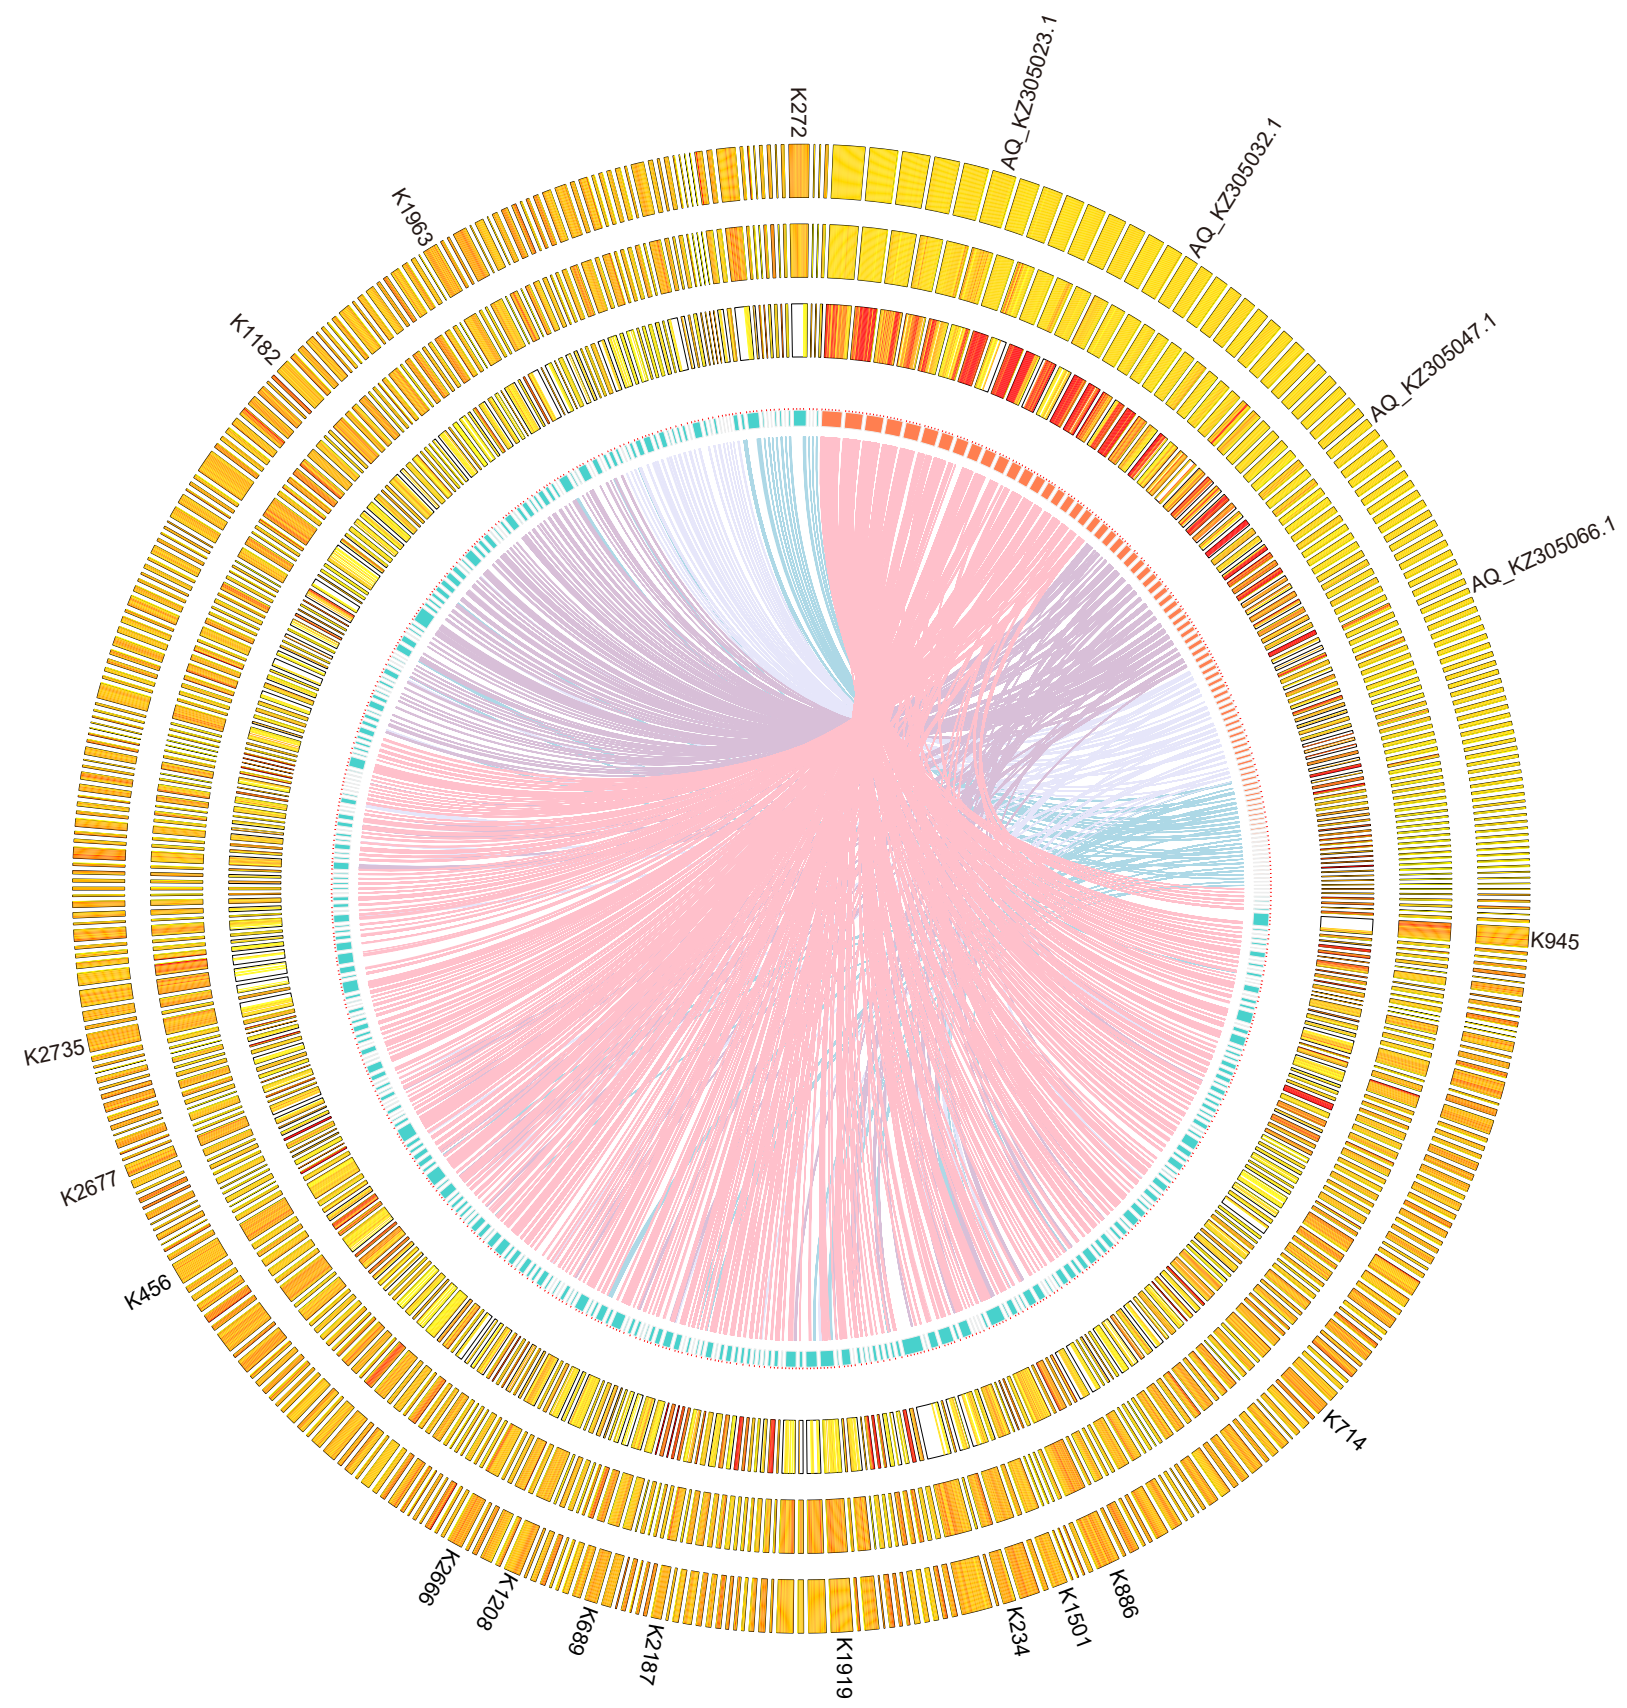

Figure 1

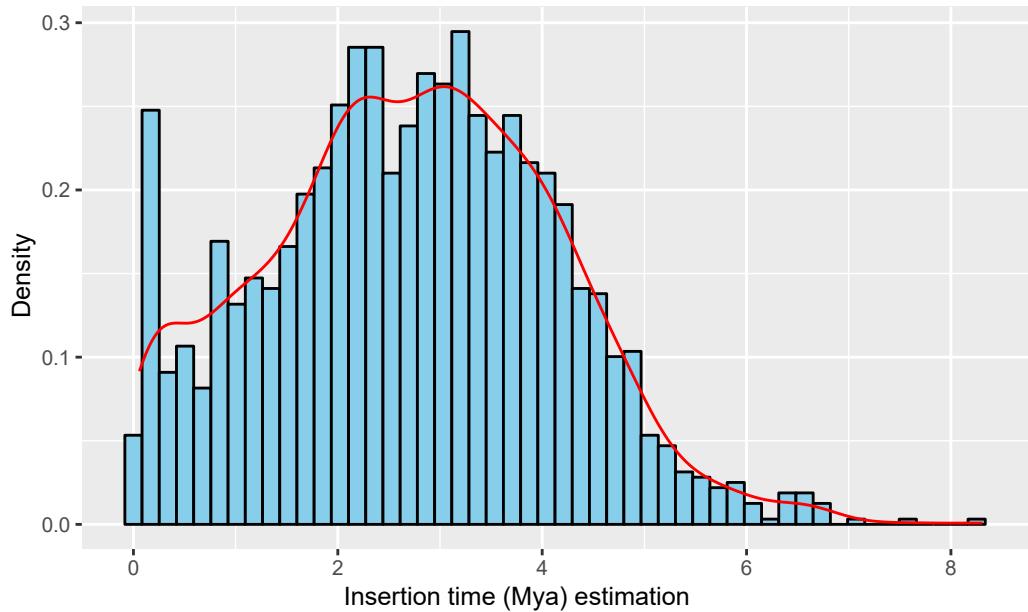

Figure 2A

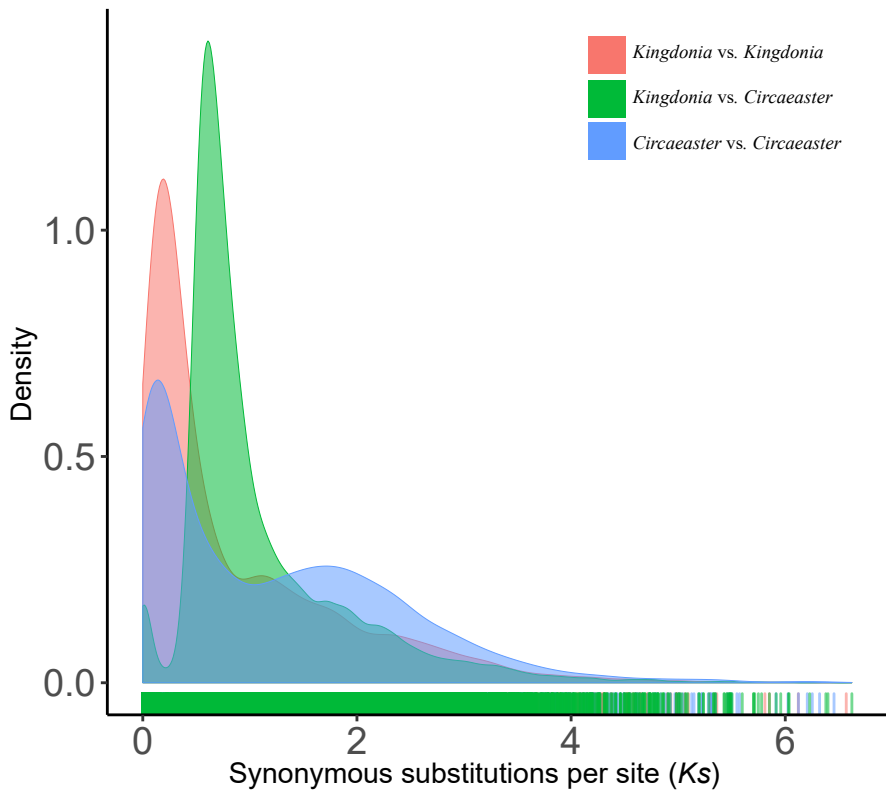

Figure 2B

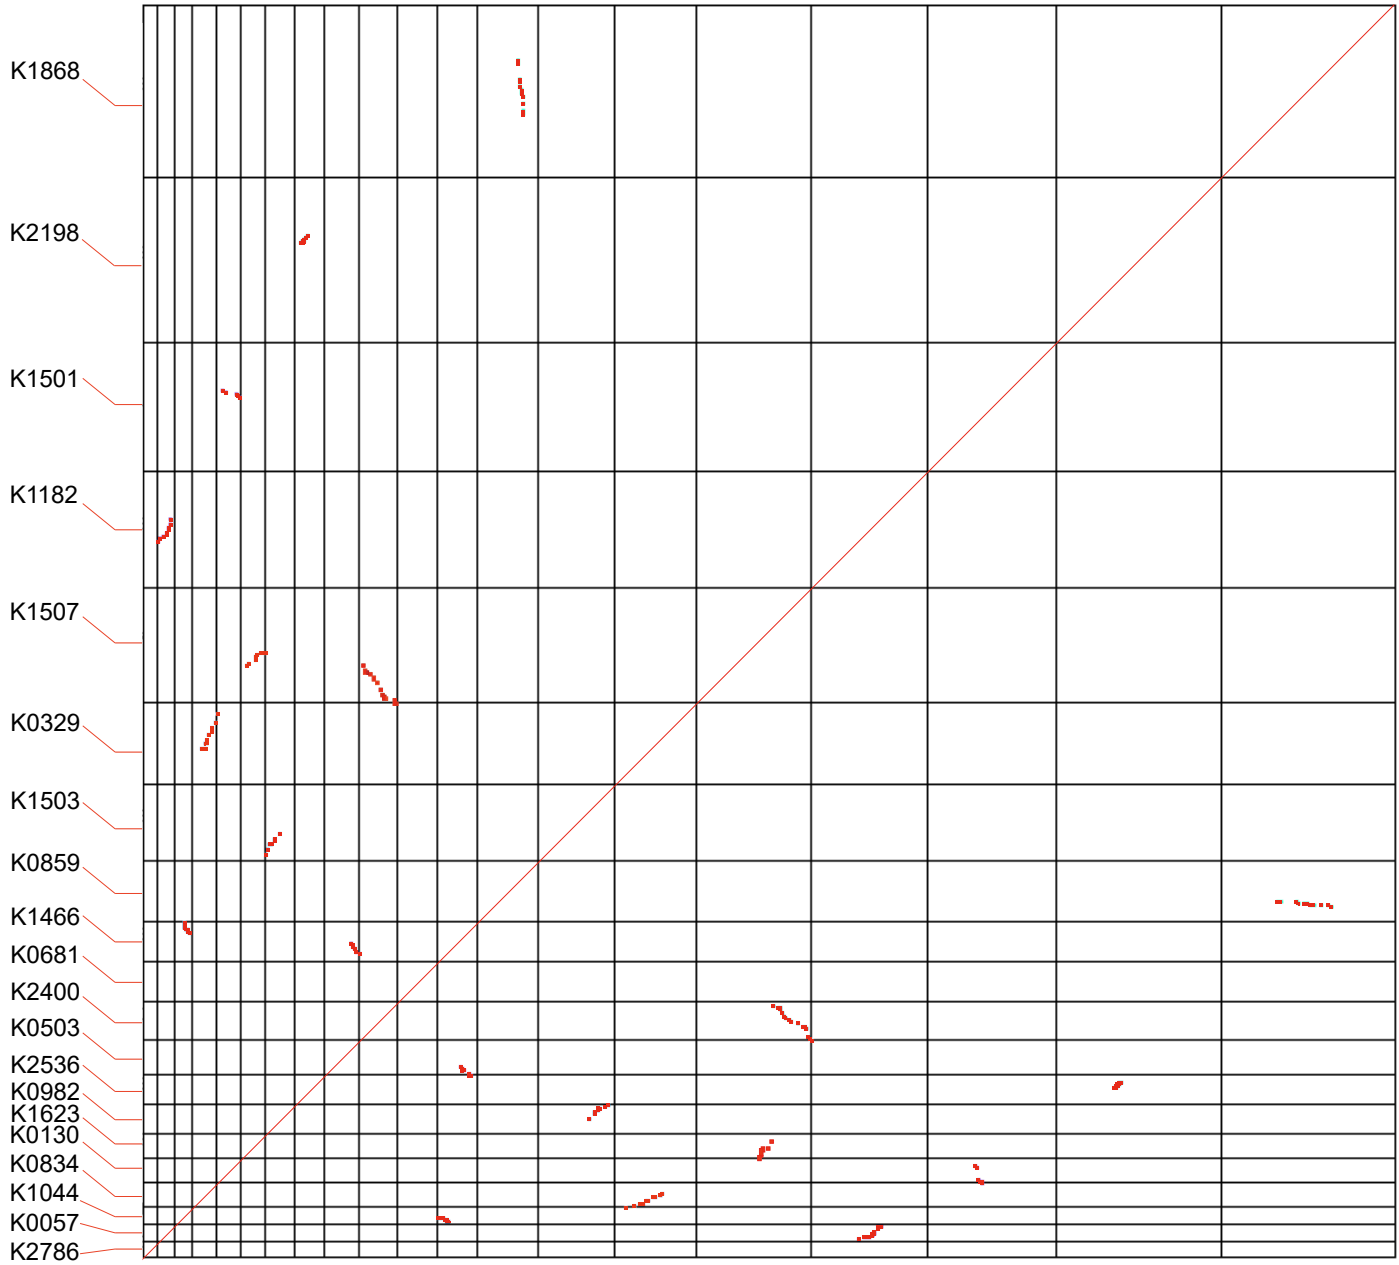

Figure 2C

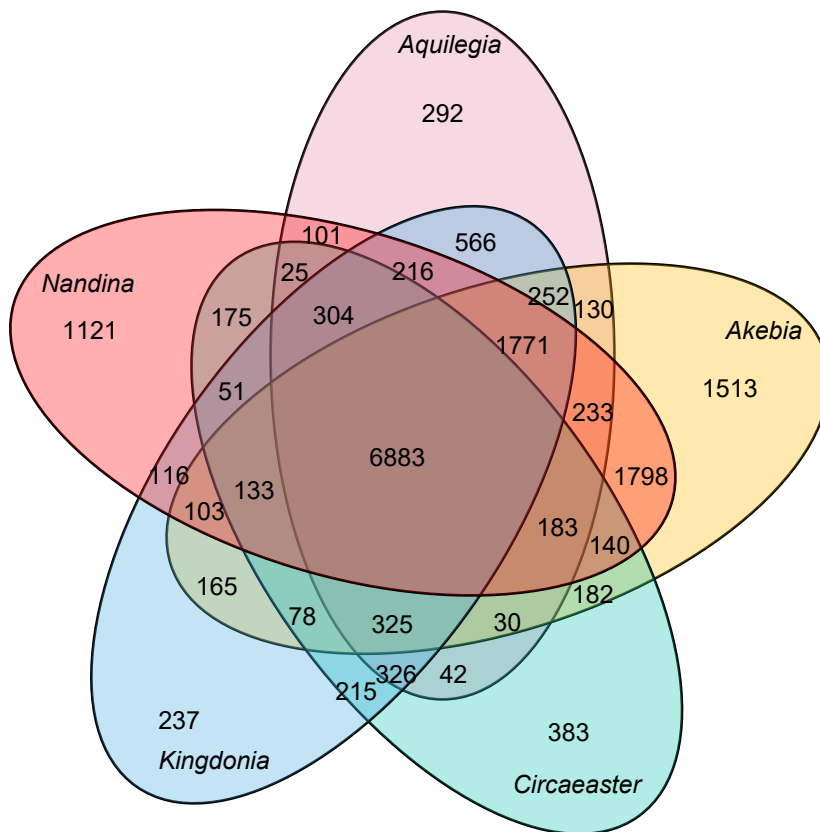

Figure 2D

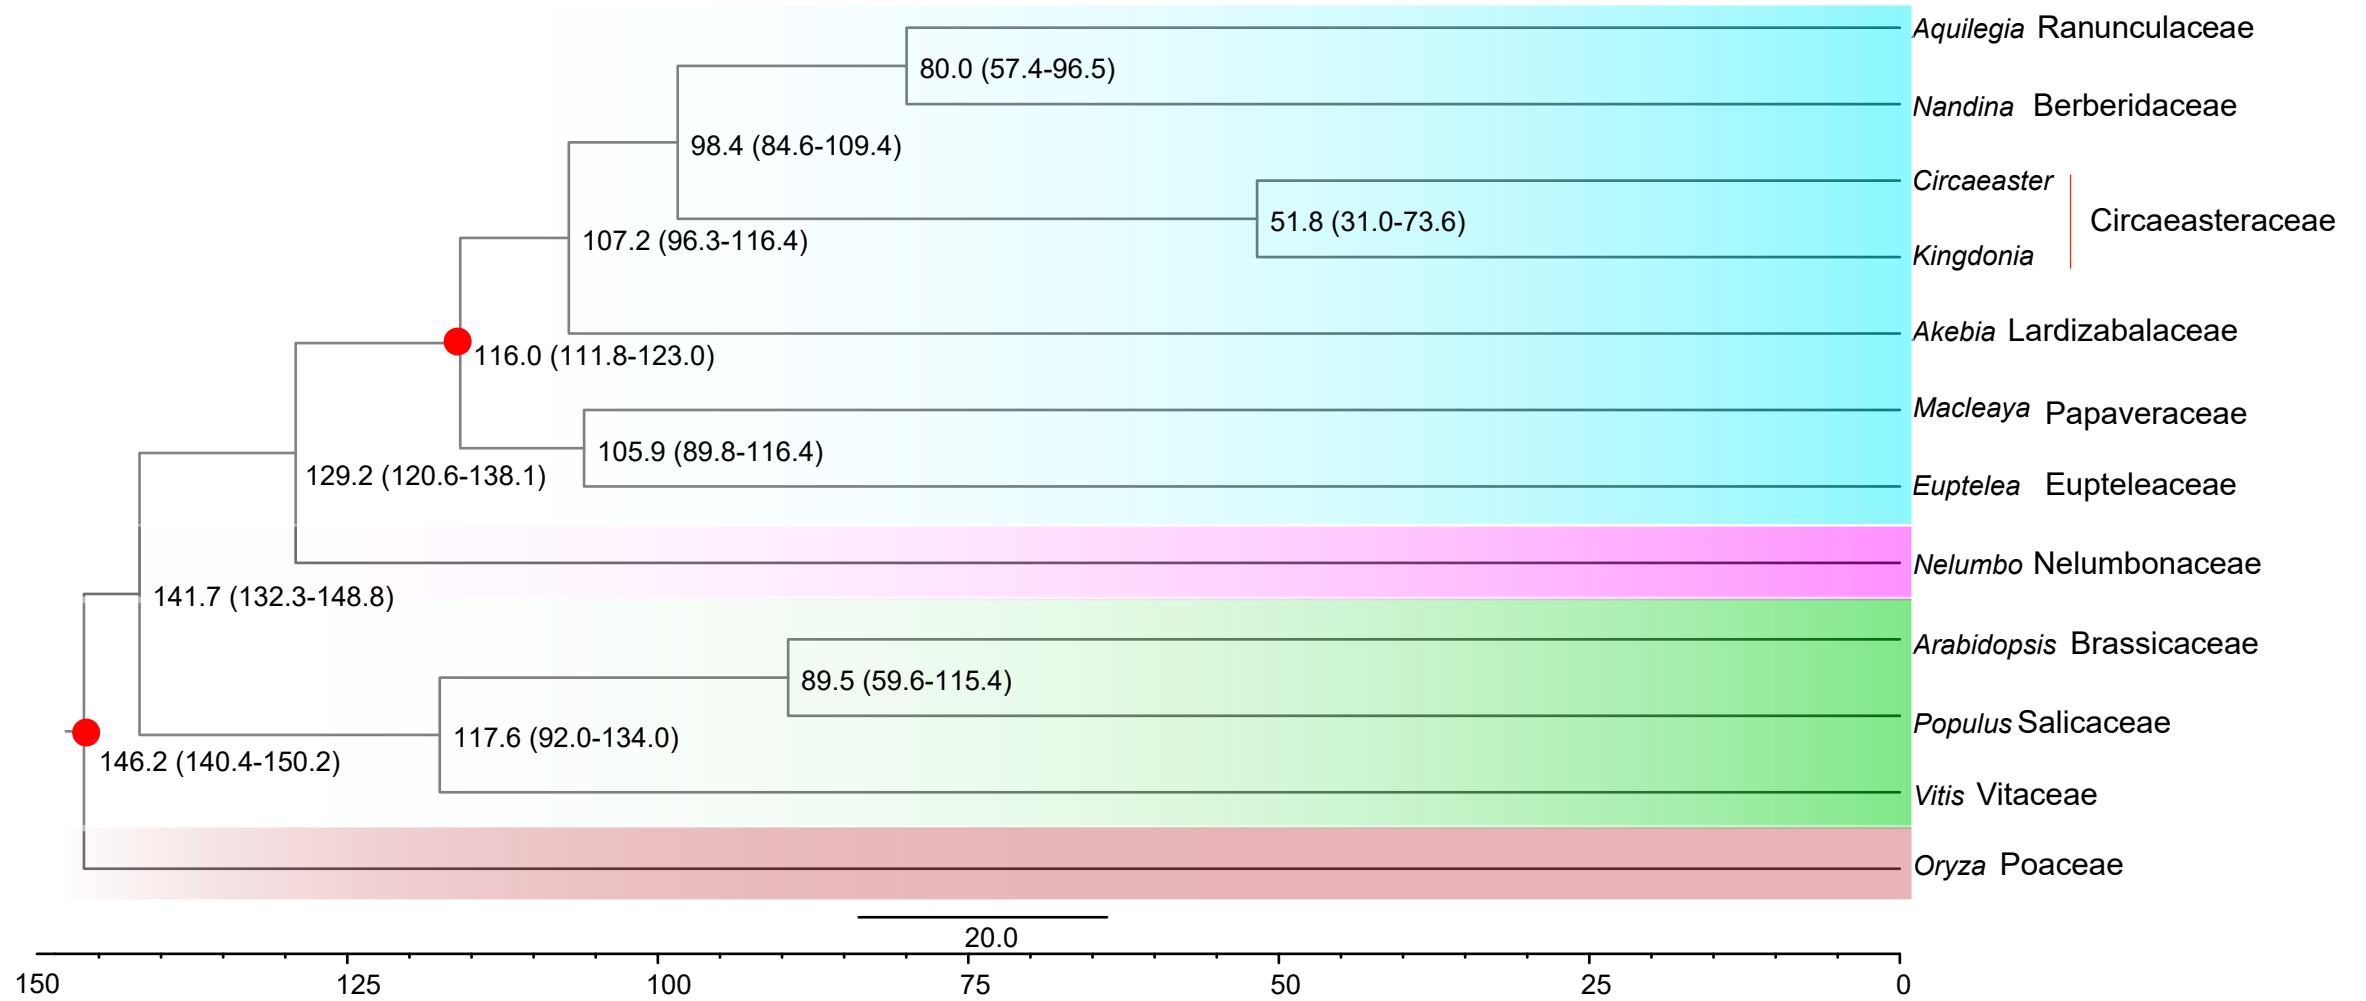

Figure 3

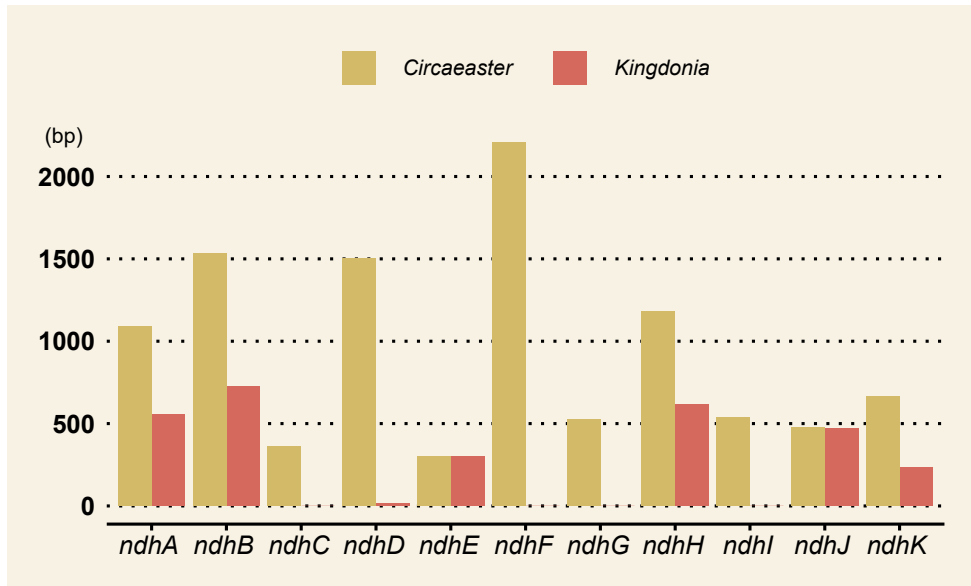

Figure 4
